# Supplementary material for: Preparation and characterization of Sm and Ca co-doped ceria–La0.6Sr0.4Co0.2Fe0.8O3−δsemiconductor–ionic composites for electrolyte-layer-free fuel cells
Source: Royal Society of Chemistry journal article supplement (doi:10.1039/c6ta05763b), 2016-01-01
Supplement: c6ta05763b1.pdf [file c6ta05763b1.pdf]

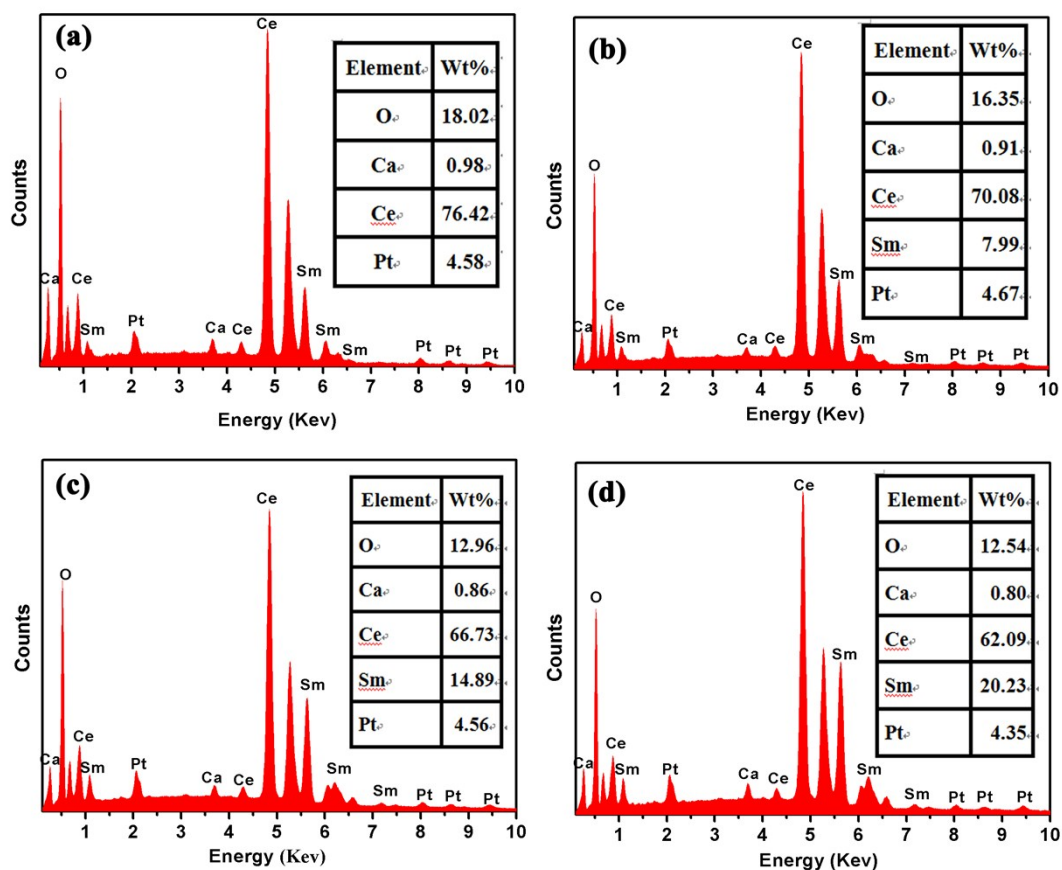

Fig. S1 The EDS spectra of Sm and Ca co-doping ceria with different Sm contents.

Table S1 the fitting results of impedance spectra

| Temperature (°C) | Rb ( $\Omega \text{ cm}^2$ ) | Rgb ( $\Omega \text{ cm}^2$ ) | Rt ( $\Omega \text{ cm}^2$ ) |
|------------------|------------------------------|-------------------------------|------------------------------|
| 400              | 0.152                        | 175.1                         | 175.252                      |
| 450              | 0.152                        | 70.0                          | 70.152                       |
| 500              | 0.150                        | 31.7                          | 31.850                       |
| 550              | 0.150                        | 12.6                          | 12.750                       |
| 600              | 0.152                        | 4.9                           | 5.052                        |

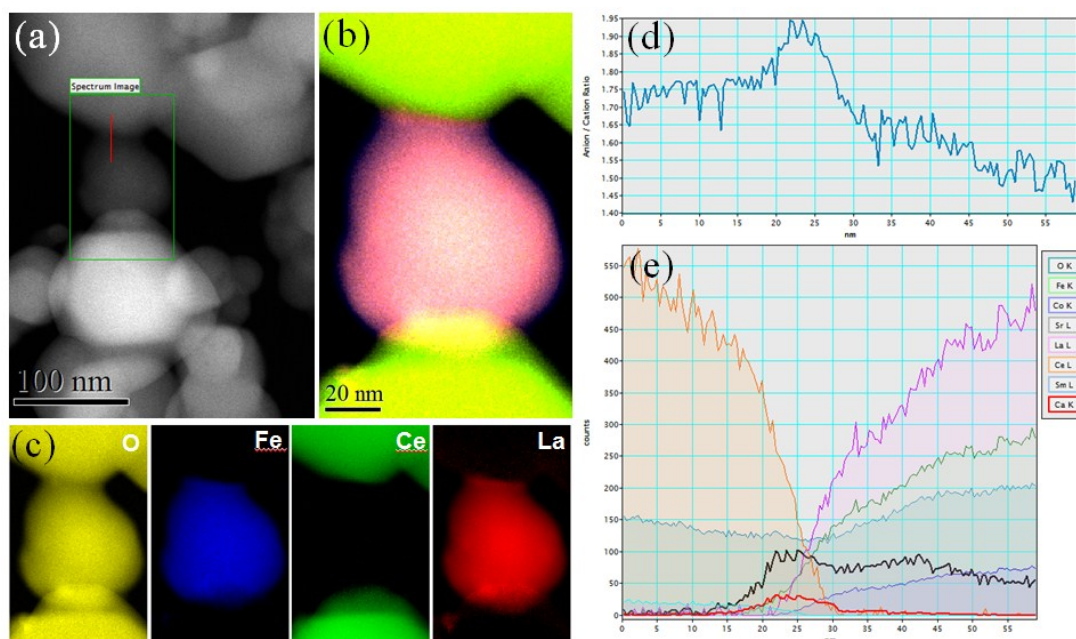

Fig. S2 STEM-EELS elemental mapping of the LSCF-SCDC2. (a) The survey image for EELS mapping and positions for line scan analysis are marked by the rectangle and red lines. (b) The combined color map of O (yellow), Fe (blue), Ce (green), and La (red); (c) EELS mapping of the main elements extracted using O-K, Fe-L3,2, Ce-M5,4, and La-M5,4 edges. (d) The anion to cation ratio across the interface. (e) The elemental distribution analysis across the interface of LSCF-SCDC2 by EDS which shows the segregation of Sr and Ca at the interface.

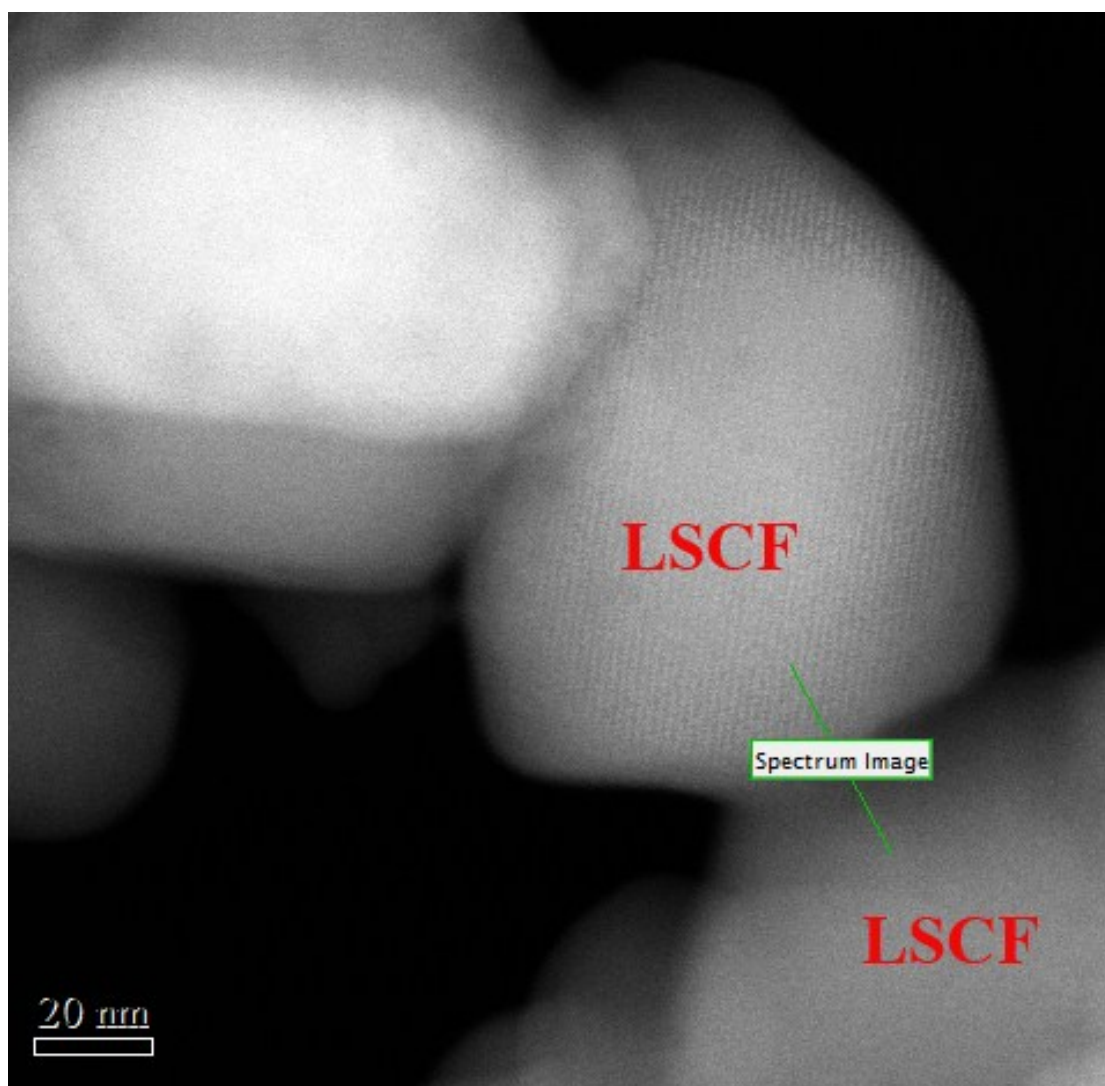

Fig. S3 the survey image including the EELS line scans across the LSCF-  
LSCF grain boundaries
